# Supplementary material
Source: publisher site journal article supplement (https://www.dovepress.com/article/559156)
Supplement: Supplementary file 1 [file 559156%20Revised%20supplementary%20materials.docx]

**Search Strategy**

**PICOT:**

P adult patients underwent cataract surgery (any kinds)

I pre-operative, intra- operative, post- operative endophthalmitis prophylaxis

C none

O endophthalmitis rate/incidence

T limit online literatures (not limit languages) – duration from 2010 to the present

**Databases:**

- MEDLINE, Cochrane library, Scopus, EMBASE
- Web of Science

**Database search terms:**

- Guideline
  - Guideline, practice guideline, clinical guideline, clinical practice guideline
- Cataract surgery
  - Cataract, cataract surgery
- Endophthalmitis prevention
  - Endophthalmitis
    - Endophthalmitis, eye infection, ocular infection
  - Prevention
    - Prevention, prophylaxis, preemptive
  - Antimicrobial, antibiotics, antiseptics
  - Infectious control

**Languages:** non-limited

**Duration:** from 2008 to the present (29 September 2023)

**PROSPERO:**

1. Mariantonia Ferrara, Francesca Gatti, David Lockington, Antonio Iaria, Stephen Kaye, Pasquale Aragona, Francesco Semeraro, Vito Romano. **Lowering post-operative endophthalmitis risk – A systematic review of the evidence on topical antimicrobials and antiseptics.** PROSPERO 2022 CRD42022354028

Available from: [https://www.crd.york.ac.uk/prospero/display_record.php?ID=CRD42022354028](https://www.crd.york.ac.uk/prospero/display_record.php?ID=CRD42022354028" \t "_self)

1. Mariam Issa, Fahmeeda Murtaza, Marko Popovic, Sherif El-Defrawy. **Intracameral Antibiotics for Endophthalmitis Prophylaxis in Cataract Surgery: A Meta-Analysis.** PROSPERO 2021 CRD42021248702

Available from: [https://www.crd.york.ac.uk/prospero/display_record.php?ID=CRD42021248702](https://www.crd.york.ac.uk/prospero/display_record.php?ID=CRD42021248702" \t "_self)

1. Roberto Gonzalez-Salinas, Nicole S Pichardo-Loera, Daniel Acosta-Arámburo, José Francisco Pérez-Vázquez, Rafael Vázquez-Rojas, Claudia Corredor-Ortega. **Antibiotic prophylaxis for the prevention of endophthalmitis in phacoemulsification surgery: Systematic Review and Meta-Analysis.** PROSPERO 2020 CRD42020180759

Available from: [https://www.crd.york.ac.uk/prospero/display_record.php?ID=CRD42020180759](https://www.crd.york.ac.uk/prospero/display_record.php?ID=CRD42020180759" \t "_self)

1. Arjan Dhoot, Marko Popovic, Soomin Lee, Sherif El-Defrawy, Matthew Schlenker. **Eye protection following cataract surgery: a systematic review.** PROSPERO 2020 CRD42020172851

Available from: [https://www.crd.york.ac.uk/prospero/display_record.php?ID=CRD42020172851](https://www.crd.york.ac.uk/prospero/display_record.php?ID=CRD42020172851" \t "_self)

**Database Search Strategy**

| **Date** | **Database** | **Search terms** | **Search options** |
| --- | --- | --- | --- |
| 30.09.23 | MEDLINE  (171) | ( (MM "Cataract+") OR cataract OR cataract surgery )  AND  ( (MM "Endophthalmitis+") OR endophthalmitis OR (eye OR ocular) infection) )  AND  ( prophyla* OR prevent* OR preemptive OR antimicrobial OR antibiotic* OR antiseptic* OR “infectious control” )  AND  ( guid* OR recommend* OR practice* ) | **Limiters** - Date of Publication: 2008-2023  **Search modes** – Boolean |
| 30.09.23 | Scopus  (243) | ( TITLE-ABS-KEY ( {cataract surgery} OR cataract )  AND  TITLE-ABS-KEY ( endophthalmitis OR {(eye OR ocular) infection*} )  AND  TITLE-ABS-KEY ( prophyla* OR prevent* OR preemptive OR antimicrobial OR antibiotic* OR antiseptic* OR {infectious control} )  AND  TITLE-ABS-KEY ( guid* OR recommend* OR practice* )  AND  PUBYEAR > 2008 AND PUBYEAR < 2023 | **Limiters** - Date of Publication: 2008-2023  **Search modes** - Boolean |
| 29.09.23 | EMBASE (157) | ('cataract surgery':ab,ti OR cataract:ab,ti)  AND  (endophthalmitis:ab,ti OR 'eye infection*':ab,ti   OR 'ocular infection*':ab,ti)  AND       (prophyla*:ab,ti OR prevent*:ab,ti OR  preemptive:ab,ti OR antimicrobial:ab,ti OR antibiotic*:ab,ti OR antiseptic*:ab,ti OR       'infectious control':ab,ti)  AND  (guid*:ab,ti OR recommend*:ab,ti OR practice*:ab,ti)  AND  [2008-2023]/py | **Limiters** - Date of Publication: 2008-2023  **Search modes** - Boolean |
| 30.09.23 | Cochrane Library  (92) | ID Search Hits  #1 MeSH descriptor: [Cataract] explode all tree 2106  #2 (cataract surgery):ti,ab,kw OR (cataract*):ti,ab,kw  (Word variations have been searched) 9071  #3 (cataract surgery) OR cataract* 9745  #4 #1 OR #2 OR #3 9754  #5 MeSH descriptor: [Endophthalmitis]   explode all trees 273  #6 (endophthalmitis):ti,ab,kw OR (eye NEXT  infection):ti,ab,kw OR (ocular NEXT infection)  :ti,ab,kw (Word variations have been searched) 1411  #7 endophthalmitis OR ((eye OR ocular)  NEXT infection) 1169  #8 #5 OR #6 OR #7 1513  #9 (prophyla*):ti,ab,kw OR (prevent*):ti,ab,kw OR  (preempt*):ti,ab,kw OR (pre-empt*):ti,ab,kw  (Word variations have been searched) 293592  #10 (antimicrobial):ti,ab,kw OR (antibiotic*):ti,ab,kw OR  (antiseptic*):ti,ab,kw OR (infectious NEXT   control):ti,ab,kw  (Word variations have been searched) 43980  #11 prophyla* OR prevent* OR (preempt* OR  pre-empt*) OR antimicrobial OR antibiotic* OR  antiseptic* OR (infectious NEXT control) 342622  #12 #9 OR #10 OR #11 342859  #13 MeSH descriptor: [Guideline] explode all trees 1015  #14 (guid*):ti,ab,kw OR (recommend*):ti,ab,kw OR  (practice*):ti,ab,kw  (Word variations have been searched) 264112  #15 Guid* OR recommend* OR practice* 285813  #16 #13 OR #14 OR #15 285815  #17 #4 AND #8 AND #12 AND #16 92 | **Limiters** - Date of Publication: 2008-2023  **Search modes** - Boolean |
